# Supplementary material for: Characterisation of the faecal microbiota in Japanese patients with paediatric-onset primary sclerosing cholangitis
Source: PubMed Central journal article supplement — Gut. 2016 Sep 26;66(7):1344–6. doi: 10.1136/gutjnl-2016-312533 (PMC5530472; doi:10.1136/gutjnl-2016-312533), 2016-09-26
Supplement: gutjnl-2016-312533supp001.pdf [file gutjnl-2016-312533supp001.pdf]

**Supplementary Table S1.** Summary of demographics and characteristics of the subjects analyzed in this study

|                                         | PSC       | UC         | HC        | <i>p</i> -value |
|-----------------------------------------|-----------|------------|-----------|-----------------|
| No. of patients                         | 27        | 16         | 23        |                 |
| Male, n (%)                             | 19 (70)   | 7 (44)     | 10 (43)   | 0.099           |
| Present age, yrs, median (min–max)      | 12 (3–24) | 13 (10–22) | 12 (3–23) | 0.491           |
| Age at onset, yrs, median (min–max)     | 6 (2–15)  | 11 (4–14)  | –         | 0.009           |
| Age at diagnosis, yrs, median (min–max) | 9 (2–16)  | 12 (6–15)  | –         | 0.126           |
| IBD n (%)                               | 27 (100)  | 16 (100)   | –         |                 |
| UC n (%)                                | 10 (41)   | 16 (100)   | –         |                 |
| IBD-U n (%)                             | 17 (59)   | 0 (0)      | –         |                 |
| PUCAI score in UC patients, n (%)       |           |            |           |                 |
| Remission (0–9)                         | 7 (70)    | 8 (50)     | –         | 0.428           |
| Mild disease activity (10–30)           | 3 (30)    | 5 (31)     | –         | 1.000           |
| Moderate disease activity (35–60)       | 0 (0)     | 2 (13)     | –         | 0.508           |
| Severe disease activity (65–)           | 0 (0)     | 1 (6)      | –         | 1.000           |
| Medication n (%)                        |           |            |           |                 |
| UDCA                                    | 21 (78)   | 0 (0)      | –         | <0.001          |
| SASP                                    | 14 (52)   | 1 (6)      | –         | 0.003           |
| Mesalazine                              | 5 (19)    | 13 (81)    | –         | <0.001          |
| Thiopurine                              | 10 (37)   | 9 (56)     | –         | 0.341           |
| Steroids                                | 7 (26)    | 2 (12)     | –         | 0.446           |
| Infliximab                              | 0 (0)     | 1 (6)      | –         | 0.372           |
| Probiotics                              | 6 (22)    | 5 (31)     | –         | 0.719           |

HC, healthy control; IBD, inflammatory bowel disease; IBD-U, inflammatory bowel disease unclassified; PSC, primary sclerosing cholangitis; PUCAI, pediatric ulcerative colitis activity index; SASP, salazosulfapyridine; UC, ulcerative colitis; UDCA, ursodeoxycholic acid. Statistical analyses were by Mann-Whitney's U-test, Kruskal-Wallis test, Chi-square test or Fisher's exact test where appropriate.

**Supplementary Table S2.** Demographics and characteristics of PSC and UC patients without SASP treatment and the HC subjects

|                                         | PSC       | UC         | HC        | <i>p</i> -value |
|-----------------------------------------|-----------|------------|-----------|-----------------|
| No. of patients                         | 13        | 15         | 23        |                 |
| Male, n (%)                             | 11 (85)   | 7 (44)     | 10 (43)   | 0.044           |
| Present age, yrs, median (min–max)      | 15 (3–24) | 13 (10–18) | 12 (3–23) | 0.507           |
| Age at onset, yrs, median (min–max)     | 8 (2–15)  | 11 (4–14)  | –         | 0.150           |
| Age at diagnosis, yrs, median (min–max) | 9 (2–16)  | 12 (6–15)  | –         | 0.459           |
| IBD n (%)                               | 13 (100)  | 15 (100)   | –         |                 |
| UC n (%)                                | 6 (46)    | 15 (100)   | –         |                 |
| IBD-U n (%)                             | 7 (53)    | 0 (0)      | –         |                 |
| PUCAI score in UC patients, n (%)       |           |            |           |                 |
| Remission (0–9)                         | 5 (83)    | 7 (47)     | –         | 0.178           |
| Mild disease activity (10–30)           | 1 (17)    | 5 (33)     | –         | 0.623           |
| Moderate disease activity (35–60)       | 0 (0)     | 2 (13)     | –         | 1.000           |
| Severe disease activity (65–)           | 0 (0)     | 1 (7)      | –         | 1.000           |
| Medication n (%)                        |           |            |           |                 |
| UDCA                                    | 7 (53)    | 0 (0)      | –         | 0.001           |
| Mesalazine                              | 5 (38)    | 13 (87)    | –         | 0.016           |
| Thiopurine                              | 2 (15)    | 8 (53)     | –         | 0.055           |
| Steroids                                | 1 (8)     | 2 (13)     | –         | 1.000           |
| Infliximab                              | 0 (0)     | 1 (7)      | –         | 1.000           |
| Probiotics                              | 3 (23)    | 5 (33)     | –         | 0.686           |

HC, healthy control; IBD, inflammatory bowel disease; IBD-U, inflammatory bowel disease unclassified; PSC, primary sclerosing cholangitis; PUCAI, pediatric ulcerative colitis activity index; SASP, salazosulfapyridine; UC, ulcerative colitis; UDCA, ursodeoxycholic acid. Statistical analyses were by Mann-Whitney's U-test, Kruskal-Wallis test, Chi-square test or Fisher's exact test where appropriate.
